# Supplementary material
Source: publisher site journal article supplement (https://www.dovepress.com/get_supplementary_file.php?f=488722.docx)
Supplement: Supplementary file 1 [file get_supplementary_file.php]

Supplementary Table 1a Cataligue numbers for the assays

| **EQA Panels** | **Part number** | **Manufacturer** | **Lot # (s)** |
| --- | --- | --- | --- |
| PAST PANEL - QCMD 2020 HIV Drug Resistance EQA Programme | HIVDR101S | Qnostics | Not applicable |
| PAST PANEL - QCMD 2020 HIV Drug Resistance Integrase EQA Programme | HIVDRInt101S | Qnostics | Not applicable |
| HUMAN IMMUNODEFICIENCY VIRUS SPIKED IN HUMAN POOLED DEFRIBRINATED AB PLASMA | Not applicable | Duke University | Not applicable |

Supplementary Table 1b Cataligue numbers for the assays

| **Reagents** | **Kit SKU** | **Manufacturer** | **Lot # (s)** |
| --- | --- | --- | --- |
| TaqPath Seq HIV-1 Genotyping Kit, 48 reaction | A54401 | Applied Biosystems™ | 2208004; 2301006 |
| ViroSeq®- HIV-1 Genotyping System v2.0 | 04J94-93 | Celera Corporation | 524779; 524523 |
| ViroSeq™ HIV-1 Integrase Genotyping Kit | 04J94-71 | Celera Corporation | 522560 |
| QIAamp Viral RNA Kits | 52906 | Qiagen | 172034474 |

Supplementary Table 2 Comparison of HIV-1 drug resistance mutations detected using the TaqPath™ Seq HIV-1 Genotyping Kit and ViroSeq® HIV-1 Genotyping Assay

|  | **Protease (PR) Resistance Associated Mutations** | | | **Reverse Transcriptase (RT) Resistance Associated Mutations** | | | **Integrase (IN) Resistance Associated Mutations** | | |
| --- | --- | --- | --- | --- | --- | --- | --- | --- | --- |
| **ID** | **Expected mutations from reference sequence** | **ViroSeq® HIV-1 Genotyping System** | **TaqPath™ Seq HIV-1 Genotyping Kit** | **Expected mutations from reference sequence** | **ViroSeq® HIV-1 Genotyping System** | **TaqPath™ Seq HIV-1 Genotyping Kit** | **Expected mutations from reference sequence** | **ViroSeq® HIV-1 Genotyping System** | **TaqPath™ Seq HIV-1 Genotyping Kit** |
| OTC001 | None | FA/FS | None | None | FA/FS | None | None | None | None |
| OTC002 | None | FA/FS | None | None | FA/FS | None |  | None | None |
| 0TC003 |  | FA/FS | None |  | FA/FS | **E138EA** | None | None | None |
| OTC004 | None | FA/FS | None | K103N | FA/FS | K103N | None | None | None |
| OTC005 | None | FA/FS | None | K101E, K103N, E138A | FA/FS | K101E, K103N, E138A | Q95K* | Q95K* | Q95K* |
| OTC006 | Q58E* | FA/FS | Q58E* | D67N, K70R, K103N, Y188L, M184V, T215IV, K219E | FA/FS | D67N, K70R, M184V, T215IV, K219E, K103N, Y188L | None | FA/FS | None |
| OTC007 | None | None | None | K103N, P225H*, M184V | M184V, K103N P225H* | M184V, K103N, P225H* | None | FA/FS | None |
| OTC008 | None | FA/FS | FA/FS | None | FA/FS | FA/FS | None | None | None |
| OTC009 | None | FA/FS | FA/FS | None | FA/FS | FA/FS | None | None | None |
| OTC010 |  | FA/FS | None |  | FA/FS | **M184V, K103S, V106M, E138A** |  | FA/FS | None |
| OTC011 | None | FA/FS | None | M184V, K103N | FA/FS | M184V, K103N | None | FA/FS | None |
| OTC012 | None | None | None | None | None | None | None | None | None |
| OTC013 |  | FA/FS | FA/FS |  | FA/FS | FA/FS | None | FA/FS | None |
| OTC014 | None | FA/FS | None | None | FA/FS | None | None | None | None |
| OTC015 |  | FA/FS | FA/FS |  | FA/FS | FA/FS |  | FA/FS | FA/FS |
| OTC016 | F53Y* | FA/FS | **M46ML**, F53Y* | None | FA/FS | None | None | FA/FS | None |
| OTC017 |  | FA/FS | None |  | FA/FS | None |  | FA/FS | FA/FS |
| OTC018 | None | None | None | None | None | None | None | None | None |
| OTC019 | None | None | None | None | None | None | None | None | None |
| OTC020 |  | FA/FS | FA/FS |  | FA/FS | FA/FS |  | FA/FS | None |
| OTC021 | None | None | None | M184V, K103N | M184V, K103N | M184V, K103N | None | None | None |
| OTC022 | M46I, I54V, L76V, V82A | M46I, I54V, L76V, V82A | M46I, I54V, L76V, V82A | K103S | K103S | K103S | None | None | None |
| OTC023 | L90M | L90M | L90M | T215C*, Y188L | T215C*, Y188L | T215C*, Y188L | None | None | None |
| 0TC024 | None | FA/FS | None | E138A, V179E* | E138A, V179E* | E138A, V179E* | None | None | None |
| OTC025 | L90M | FA/FS | L90M | None | FA/FS | None | None | None | None |
| OTC026 | None | None | None | D67N*,, K219Q, K103N | D67N*, K219Q, K103N | D67N*, K219Q, K103N | None | None | None |
| OTC027 | None | None | None | E138A | E138A | E138A | None | None | None |
| OTC028 | M46L | FA/FS | M46L | None | FA/FS | None | None | None | None |
| OTC029 | None | None | None | K103N | K103N | K103N | None | None | None |
| OTC030 | None | None | None | K65R, Y115F, M184V, K101E, Y181C, G190S | **K65E**, Y115F, M184V, K101E, Y181C, G190S | K65R, Y115F, M184V, K101E, Y181C, G190S, | None | None | None |
| OTC031 | None | None | None | K103N, Y188L | K103N, Y188L | K103N, Y188L | E157Q* | E157Q* | E157Q* |
| OTC032 | None | FA/FS | None | A62V*, K103S, E138A | FA/FS | A62V*, K103S, E138A | None | None | None |
| OTC033 | None | None | None | V179E* | V179E* | V179E* | None | None | None |
| OTC034 |  | FA/FS | None |  | FA/FS | **D67N, K70R, M184V, K219Q** | T125A# | FA/FS | T125A# |
| OTC035 | None | FA/FS | FA/FS | None | FA/FS | FA/FS | T125A#, G163E# | FA/FS | T125A#, G163E# |
| OTC036 |  | FA/FS | FA/FS |  | FA/FS | FA/FS | T125A# | FA/FS | T125A# |
| OTC037 |  | None | None |  | E40F, M41L | E40F, M41L, **M184V, L210W, T215Y** | **None** | **D232N*** | **D232N*** |
| OTC038 | L10F*, D30N, N88D | FA/FS | L10F*, D30N, N88D | M41L, E44D*, D67N, M184V, L210W, T215Y, A98G* | FA/FS | M41L, E44D*, D67N, **T69D***, M184V, L210W, T215Y, A98G* | T125A# | FA/FS | T125A# |
| OTC039 |  | FA/FS | K20I*, M36I*, L63S*, H69K*, L89M* | V179I* | V179I* | V179l* |  | None | None |
| OTC040 | None | FA/FS | None | M41L, M184V, L210W, T215Y | FA/FS | **E40F*,** M41L, M184V, L210W, T215Y |  | D232N* | D232N* |
| OTC041 | M36I*, I64V* | FA/FS | M36I*, I64V* | None | FA/FS | None |  | FA/FS | None |
| OTC042 | M36I*, H69K*, L89M*, I93L* | FA/FS | M36I*, H69K*, L89M*, I93L* | D67N, K70R, M184V, K219Q | FA/FS | D67N, K70R, M184V, K219Q | None | FA/FS | None |
| OTC043 | L10F*, G16E*, D30N, M36V*, I62V*, T74S*,N88D,L89M*,I93L* | FA/FS | L10F*, G16E*, D30N, M36V*, I62V*, T74S*, N88D, L89M*, I93L* | M41L, D67N, T69D*, A98G*, M184V, L210W, T215Y | FA/FS | **E44D*** M41L, D67N, T69D*, A98G*, M184V, L210W, T215Y | None | FA/FS | None |

*Notes. Blanks under ‘Expected pre-characterized mutations’ show that these samples were not previously genotyped; In bold are discordant mutations; FA/FS indicates that the sample failed amplification or sequencing with the genotyping kit; * indicates non-major mutations including minor, accessory, or other mutations as described by the Stanford HIV drug resistance database; # are polymorphic mutations that do not appear to be selected by Integrase inhibitor drug*
